# Supplementary material
Source: HighWire-hosted journal article supplement (http://www.ajnr.org/highwire/filestream/52177/field_highwire_adjunct_files/0/2361_table.pdf)
Supplement: 2361_table.pdf [file 2361_table.pdf]

**On-line Table: Clinical and neuroradiologic data of the 34 adult patients with AT/RT of the CNS**

| No. | Age (yr)/Sex | Tumor Location      | Surgery | OS (mo)         | Neuroradiologic Findings                      |                                                                | Year        |
|-----|--------------|---------------------|---------|-----------------|-----------------------------------------------|----------------------------------------------------------------|-------------|
|     |              |                     |         |                 | CT                                            | MR Imaging                                                     |             |
| 1   | 50/F         | R temporal          | TR      | 13              | Isodense                                      | Extensive edema, intense and rim enhancement                   | Our patient |
| 2   | 25/M         | L parieto-occipital | TR      | 25              | N/A                                           | Mild edema, diffusion restriction, intense and rim enhancement | Our patient |
| 3   | 24/M         | R temporo-occipital | TR      | 10              | N/A                                           | Extensive edema, intense and rim enhancement, bone involved    | Our patient |
| 4   | 35/F         | R frontal           | PR      | 20              | Isodense, calcification                       | Mild edema, intense and rim enhancement                        | Our patient |
| 5   | 32/M         | R frontal           | TR      | 32 <sup>a</sup> | N/A                                           | Extensive edema, intense and rim enhancement                   | Our patient |
| 6   | 21/M         | L temporal          | PR      | 72              | Hyperdense, intense heterogeneous enhancement | N/A                                                            | 1992        |
| 7   | 18/M         | L frontal           | TR      | 18              | ND                                            | N/A                                                            | 1993        |
| 8   | 32/M         | L frontal           | Biopsy  | 5               | N/A                                           | N/A                                                            | 1996        |
| 9   | 34/M         | L parietal          | Biopsy  | 6               | Hyperdense, hemorrhage, mild enhancement      | Mild edema, peripheral enhancement                             | 1997        |
| 10  | 27/M         | Pineal region       | PR      | 24              | N/A                                           | Strong homogeneous enhancement                                 | 1999        |
| 11  | 35/M         | L temporal          | PR      | 60              | ND                                            | ND                                                             | 1999        |
| 12  | 20/M         | L parietal          | TR      | 24              | Isodense, homogeneous enhancement             | Moderate edema, hemorrhage, intense enhancement                | 2000        |
| 13  | 32/F         | Suprasellar         | PR      | N/A             | N/A                                           | Intense enhancement                                            | 2000        |
| 14  | 30/F         | Cerebellum          | TR      | 11              | N/A                                           | Heterogeneous enhancement                                      | 2001        |
| 15  | 21/F         | Spinal cord         | N/A     | 6               | N/A                                           | N/A                                                            | 2001        |
| 16  | 34/F         | Parietal            | N/A     | 6               | N/A                                           | N/A                                                            | 2001        |
| 17  | 31/F         | R parietal          | PR      | 6               | N/A                                           | N/A                                                            | 2003        |
| 18  | 35/M         | Thalamus            | N/A     | N/A             | N/A                                           | Mild edema, peripheral enhancement                             | 2003        |
| 19  | 22/M         | Cerebellum          | PR      | 24              | N/A                                           | Diffusion restriction, choline elevated, intense enhancement   | 2004        |
| 20  | 20/F         | R occipital         | TR      | 10              | N/A                                           | Intense and rim enhancement                                    | 2005        |
| 21  | 20/F         | Sellar              | N/A     | 28              | N/A                                           | Partially cystic, heterogeneous enhancement                    | 2005        |
| 22  | 31/F         | Sellar              | N/A     | 9               | N/A                                           | ND                                                             |             |
| 23  | 45/M         | R cerebellar        | N/A     | 15              | N/A                                           | ND                                                             |             |
| 24  | 19/M         | Posterior fossa     | TR      | 56.5            | N/A                                           | N/A                                                            | 2006        |
| 25  | 27/M         | R frontal           | TR      | 4               | N/A                                           | Extensive edema, intense and rim enhancement                   | 2006        |
| 26  | 23/M         | L temporal          | TR      | 1.5             | N/A                                           | Moderate edema, hemorrhage, peripheral enhancement             | 2007        |
| 27  | 43/F         | Spinal cord         | PR      | 30              | N/A                                           | Intense enhancement                                            | 2007        |
| 28  | 23/M         | L temporal          | TR      | 30              | N/A                                           | Moderate edema, hemorrhage, heterogeneous enhancement          | 2008        |
| 29  | 25/F         | R frontal           | TR      | 204             | ND                                            | N/A                                                            |             |
| 30  | 42/M         | R frontoparietal    | PR      | 18              | N/A                                           | N/A                                                            |             |
| 31  | 37/M         | R frontoparietal    | N/A     | N/A             | ND                                            | ND                                                             |             |
| 32  | 56/F         | Sella turcica       | Biopsy  | 23              | N/A                                           | Heterogeneous enhancement                                      | 2008        |
| 33  | 24/F         | L frontal           | PR      | 14              | N/A                                           | Extensive edema, heterogeneous enhancement                     | 2009        |
| 34  | 18/M         | R frontotemporal    | TR      | 4               | N/A                                           | Extensive edema, hemorrhage, peripheral enhancement            | 2009        |

<sup>a</sup> Indicates the patient was alive at the time of writing.
